# Supplementary material
Source: HighWire-hosted journal article supplement (https://srh.bmj.com/content/48/2/117)

Supplementary Figure 2. The percentage acceptance rate towards the four contraceptive mechanisms in women with different religions.

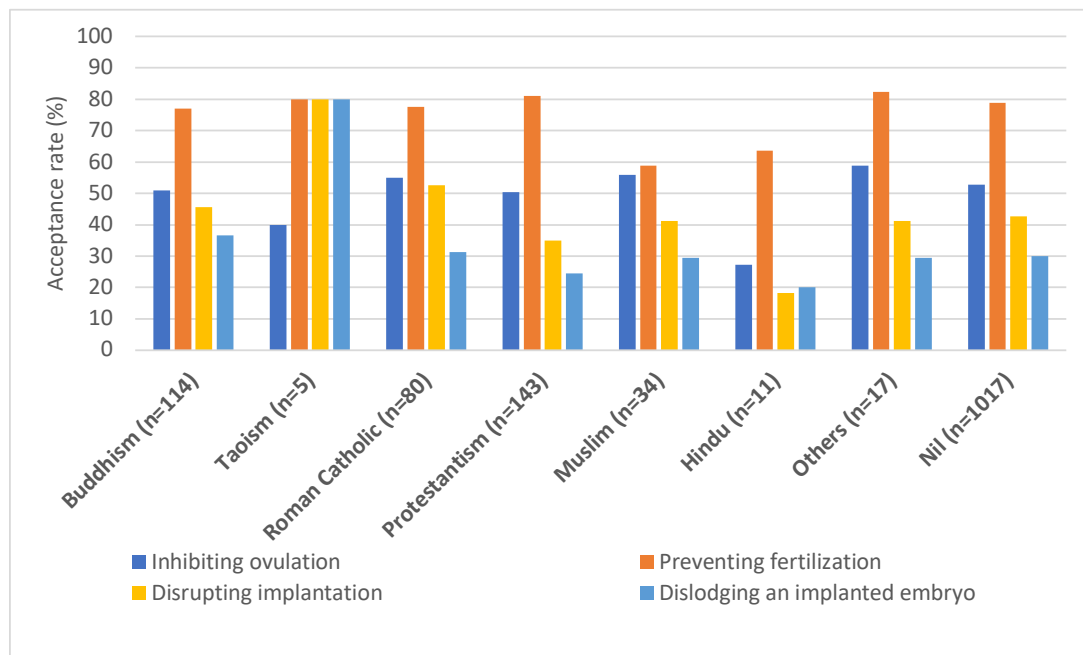

Supplement: inline-supplementary-material-2 [file inline-supplementary-material-2.pdf]
